# Supplementary material for: Structure of the Dual-Mode Wnt Regulator Kremen1 and Insight into Ternary Complex Formation with LRP6 and Dickkopf
Source: PubMed Central journal article supplement (PMC5014086; doi:10.1016/j.str.2016.06.020), 2016-09-06
Supplement: mmc1.pdf [file mmc1.pdf]

**Structure, Volume 24**

**Supplemental Information**

**Structure of the Dual-Mode Wnt Regulator**

**Kremen1 and Insight into Ternary Complex**

**Formation with LRP6 and Dickkopf**

**Matthias Zebisch, Verity A. Jackson, Yuguang Zhao, and E. Yvonne Jones**

# **Structure of the dual mode Wnt regulator Kremen1 and insight into ternary complex formation with LRP6 and Dickkopf**

Matthias Zebisch, Verity A. Jackson, Yuguang Zhao & E. Yvonne Jones

## **Supplementary Information**

### **Inventory of Supplemental Information**

Figure S1: Representative electron density for the ternary complex solved at low resolution. Relates to Figure 2.

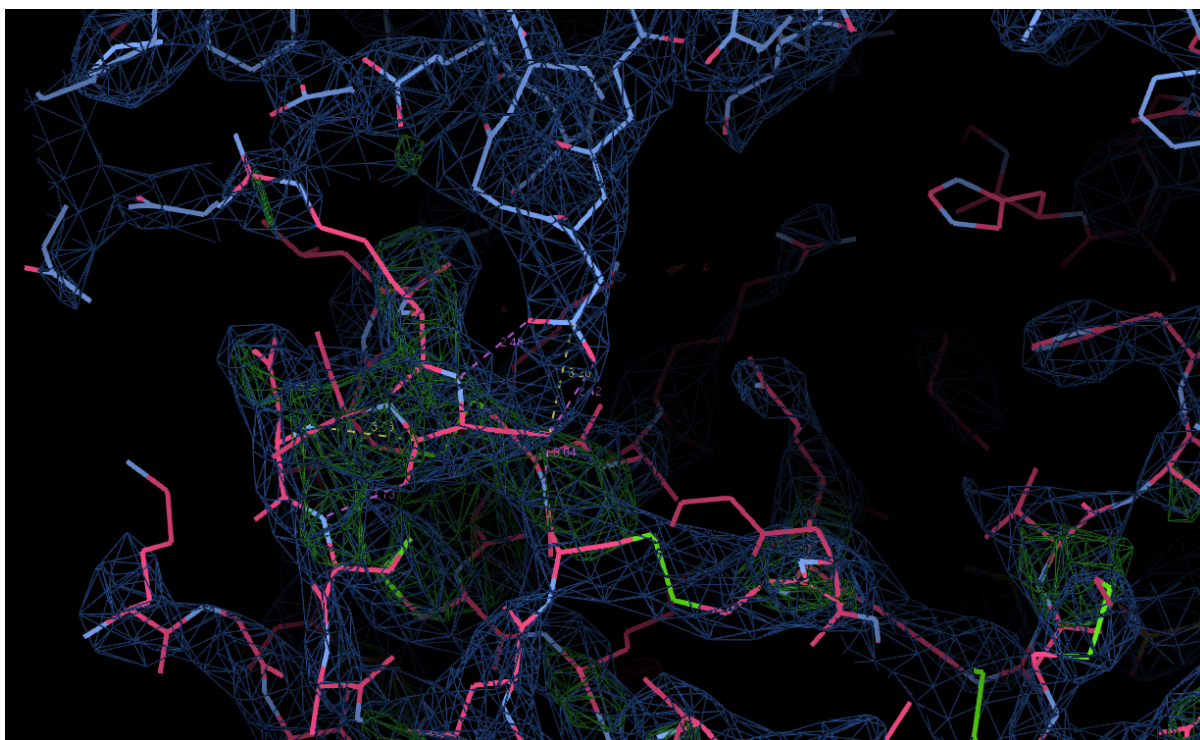

**Figure S1: Representative electron density for the ternary complex solved at low resolution. Relates to Figure 2.** The KRM1-DKK1 interaction around D201 (KRM1) and S192 (DKK1) is highlighted. Shown is the 2FoFc map calculated for the final model contoured at  $1\sigma$  in blue and the FoFc DKK1 omit map contoured at  $3\sigma$  in green.
